# Supplementary material
Source: Springer Nature journal article supplement (https://www.springermedizin.de/resource/supplementary/12913_2013_3027_MOESM3_ESM.pdf/9533366)
Supplement: MOESM3 [file 9533366]

**Figure 1: Mentorship Programme Implementation**

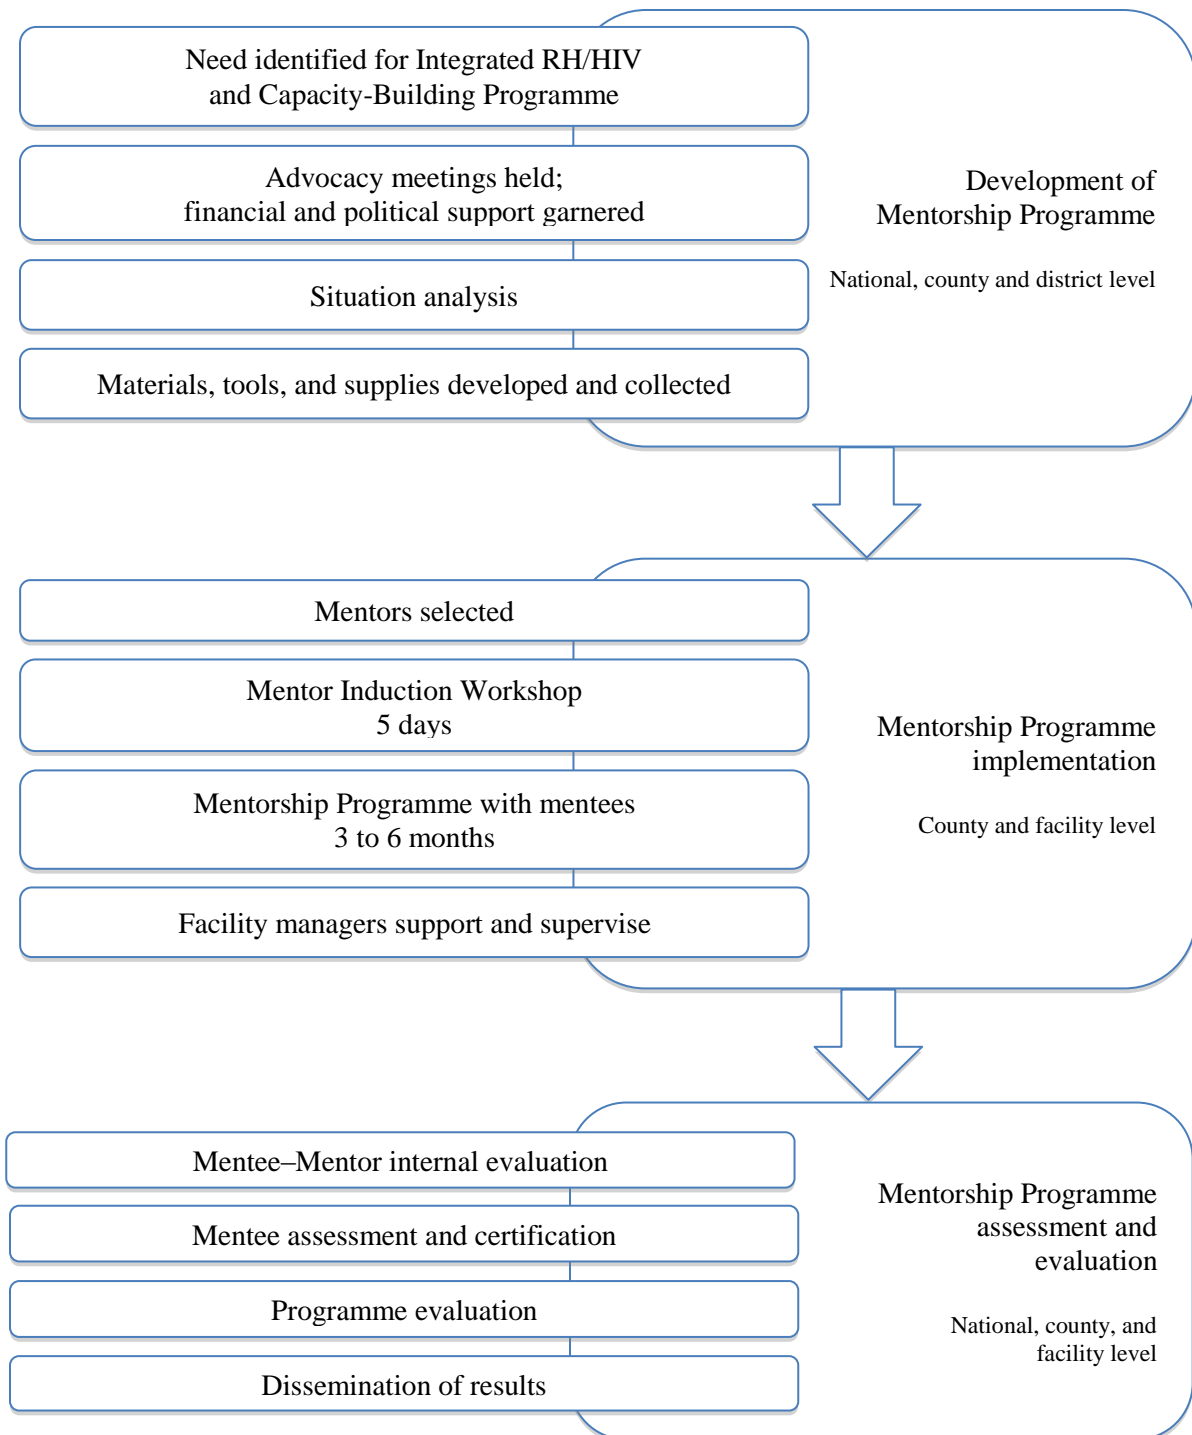

*Adapted from The National Mentorship Guidelines to Strengthen Integration of RH and HIV Service Provision, First Edition, February 2013, Population Council/ Ministry of Health, Kenya.*
